# Supplementary material for: Determination methods for the anticancer drug dicycloplatin, a supramolecule assembled through hydrogen bonding
Source: Royal Society of Chemistry journal article supplement (doi:10.1039/c4an02274b), 2015-01-01

Supplementary figure 1: Separation of carboplatin and dicycloplatin by aqueous capillary electrophoresis

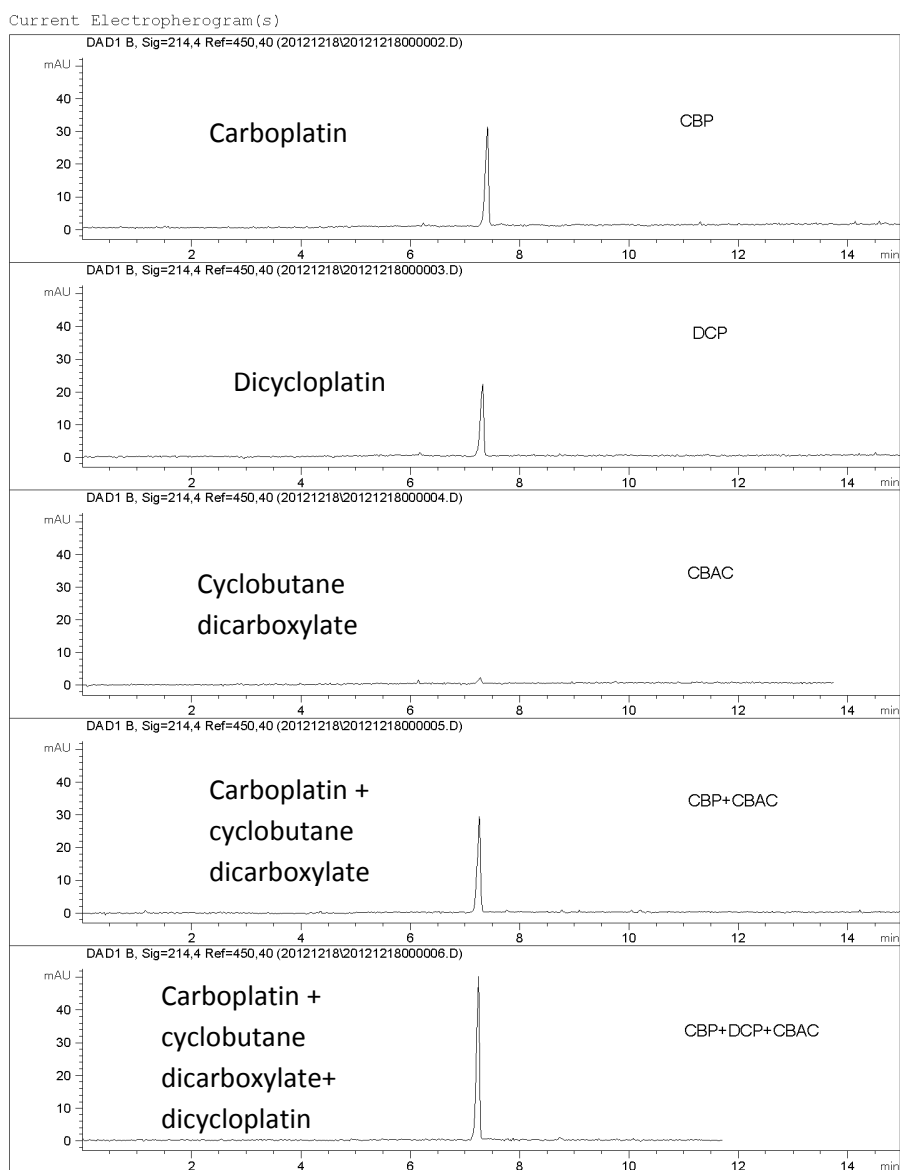

Supplementary figure 2: Separation of carboplatin and dicycloplatin by non-aqueous capillary electrophoresis

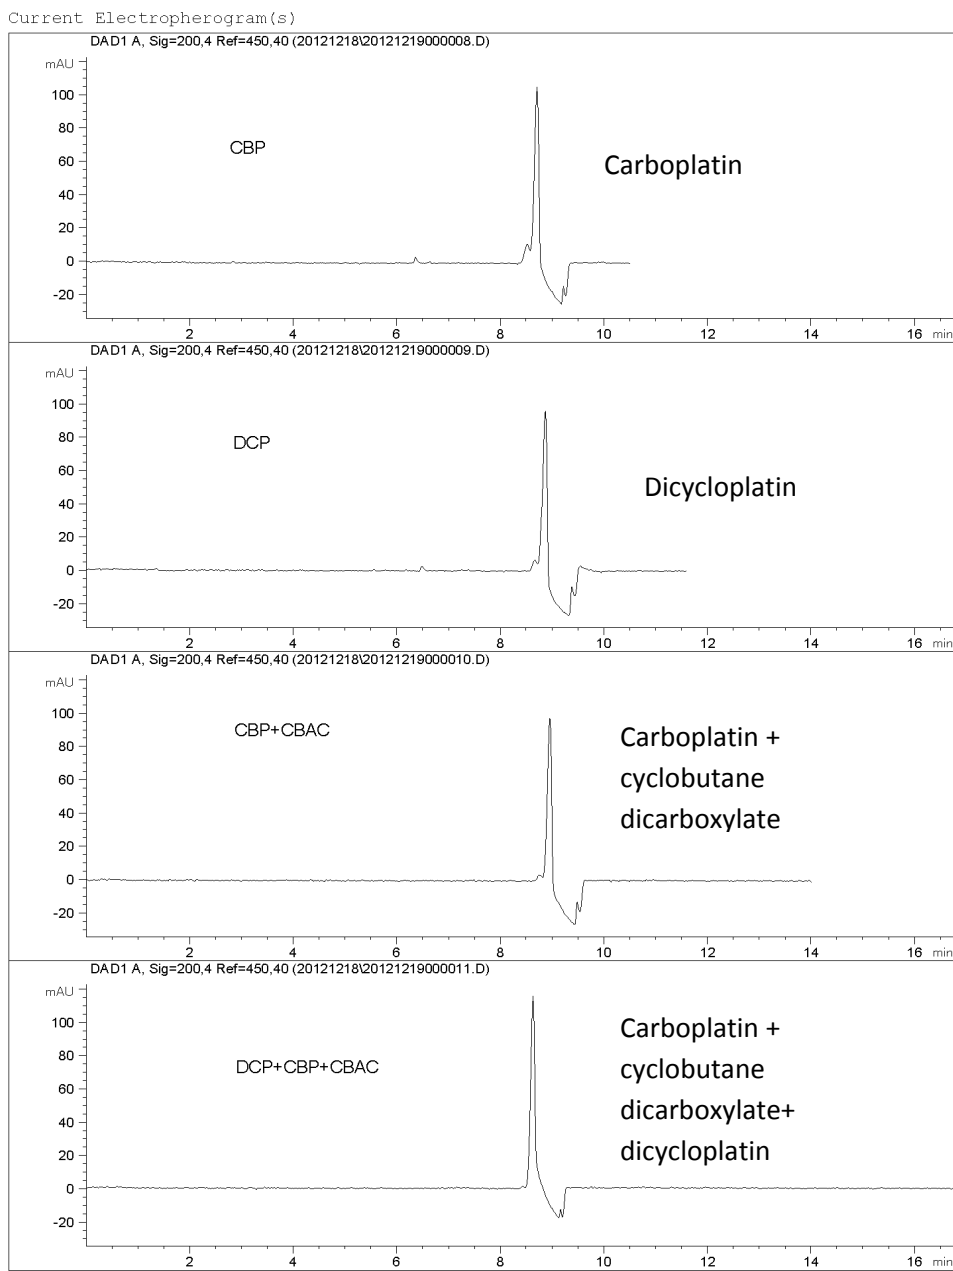

Supplementary figure 3: Separation of carboplatin and dicycloplatin by micellar electrokinetic chromatography

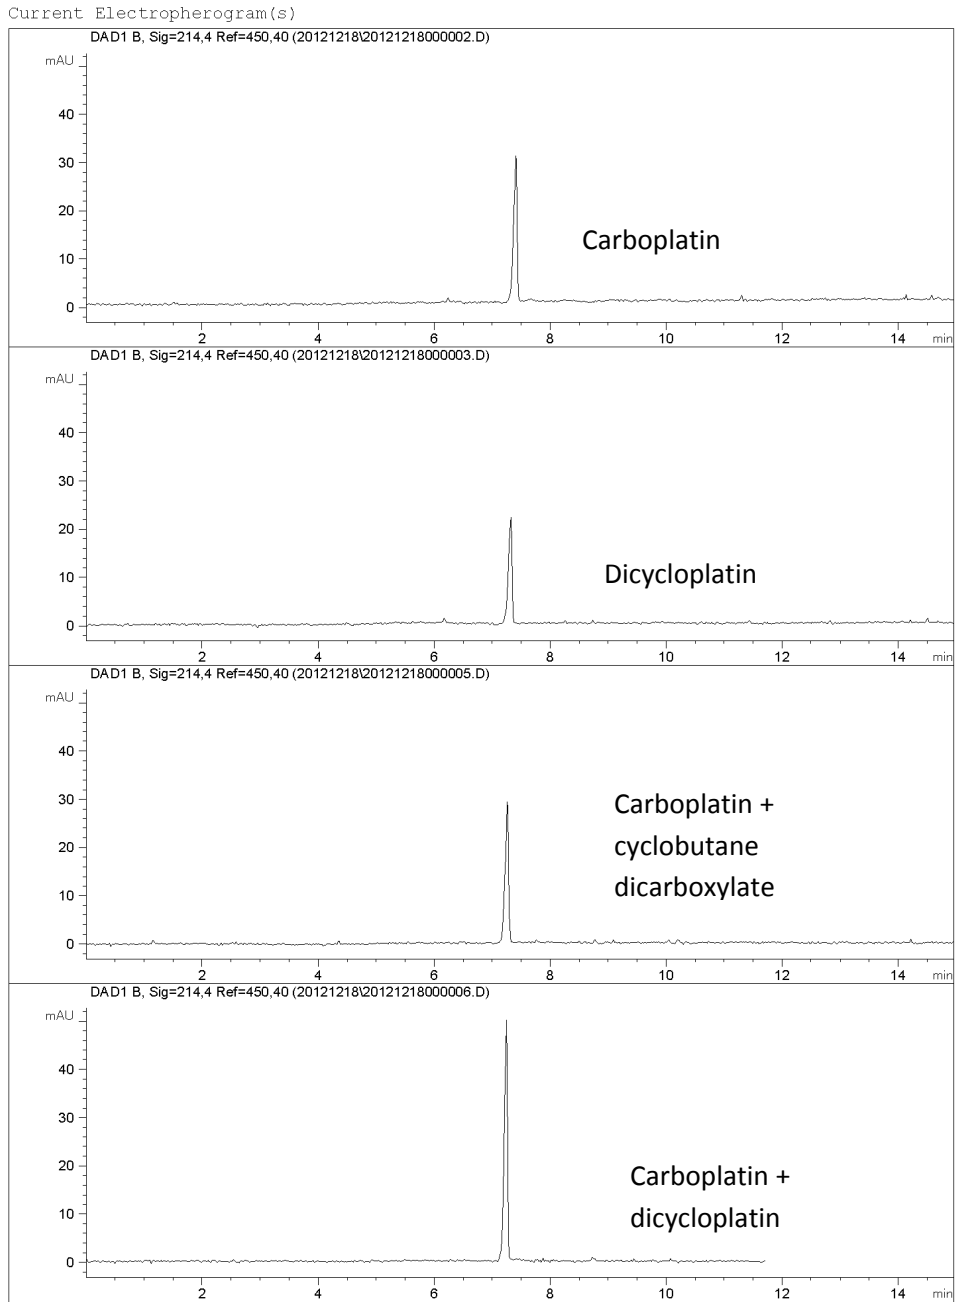

Supplementary figure 4: IR spectrum of dicycloplatin

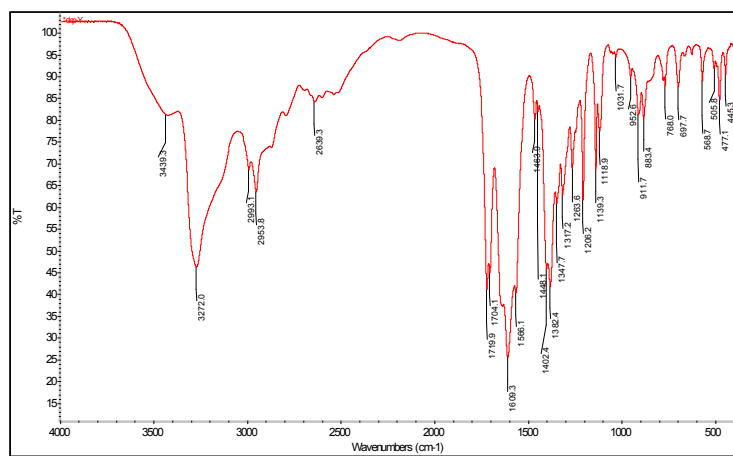

Supplementary figure 5: IR spectrum of lyophilized (mixture) powders of carboplatin and cyclobutane dicarboxylate

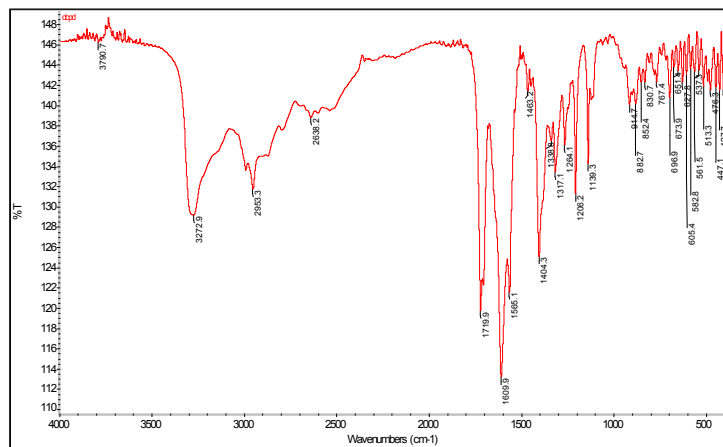

Supplementary figure 6: IR spectrum of physical abrasive mixtures of carboplatin and cyclobutane dicarboxylate powder

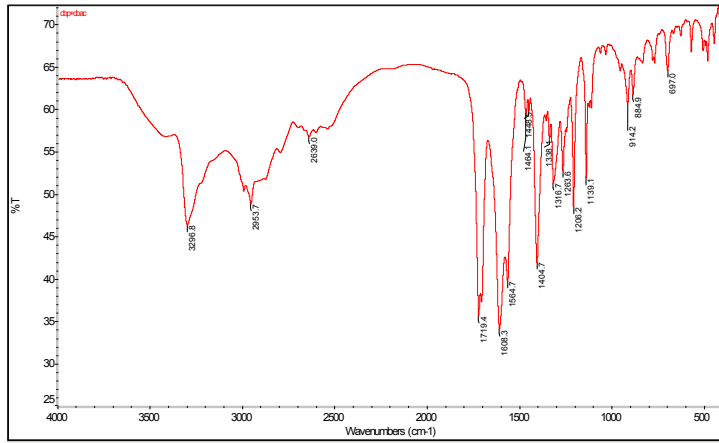

Supplement: c4an02274b1.pdf [file c4an02274b1.pdf]
